# Supplementary material for: Facile synthesis of mesoporous SiO2 nanoparticles using the mobility differences of etchants
Source: Royal Society of Chemistry journal article supplement (doi:10.1039/c5ra01154j), 2015-01-01
Supplement: c5ra01154j1.pdf [file c5ra01154j1.pdf]

# Supporting Information

## Facile Synthesis of Mesoporous SiO<sub>2</sub> Nanoparticles using the Mobility Differences of Etchants

*Yi Seul Lee,<sup>a</sup> Woo Ri Jang,<sup>b</sup> Hye Young Koo<sup>\*b</sup> and Won San Choi<sup>\*a</sup>*

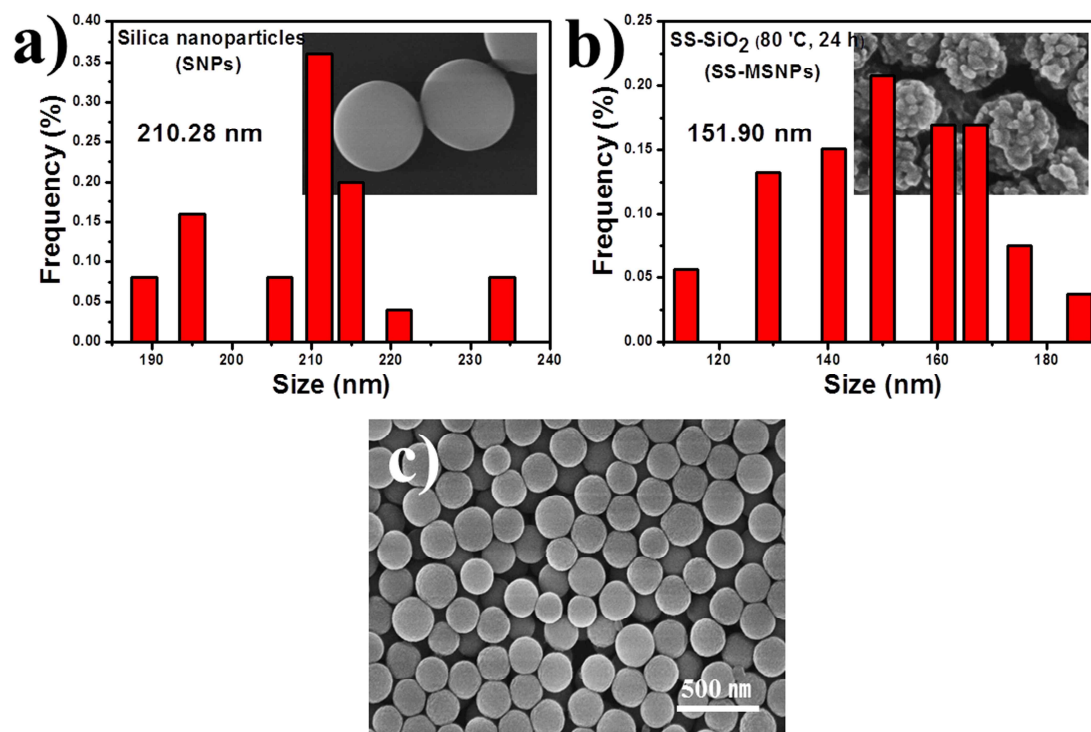

**Fig. S1** Average sizes of (a) SNPs and (b) MSNPs. (c) SEM image of SNPs after heat treatment at 80°C in the absence of SS monomer.

| <b>Sample name</b>                            | <b>Zeta potential (mV)</b> |
|-----------------------------------------------|----------------------------|
| <b>Silica nanoparticles (SNP)</b>             | <b>-65.58</b>              |
| <b>Mesoporous silica nanoparticles (MSNP)</b> | <b>-91.34</b>              |

**Fig. S2** Zeta potential data of SNPs and MSNPs. Measurements were repeated three times for each measurement, and the average value was used.

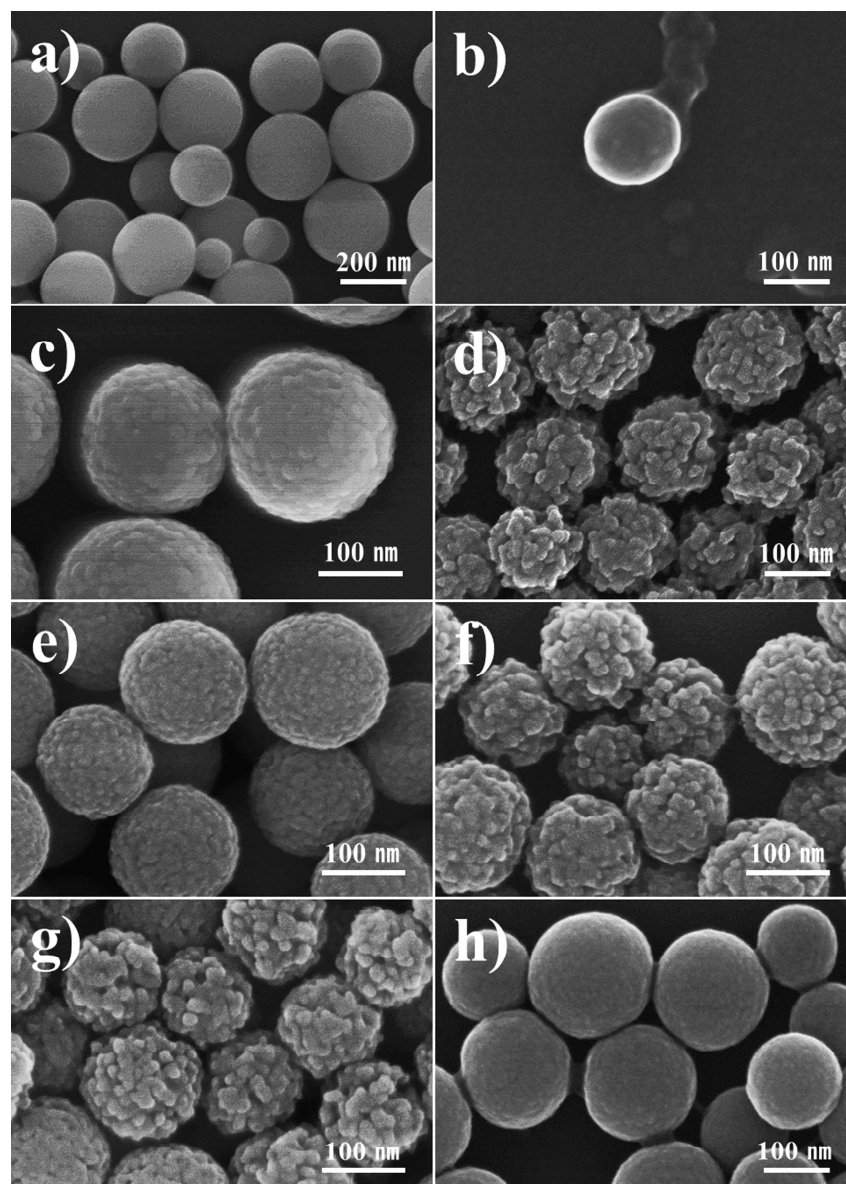

**Fig. S3** SEM images of SNPs after treatments with various types of chemicals at 80°C for 24 hours. (a) No chemical treatment (24 h), (b) Na<sub>2</sub>SO<sub>4</sub> (24 h), (c) PSS (24 h), (d) SDS (24 h), (e) SDS (1 h), (f) SDS (6 h), (g) SDS (12 h), and (h) AA (24 h).

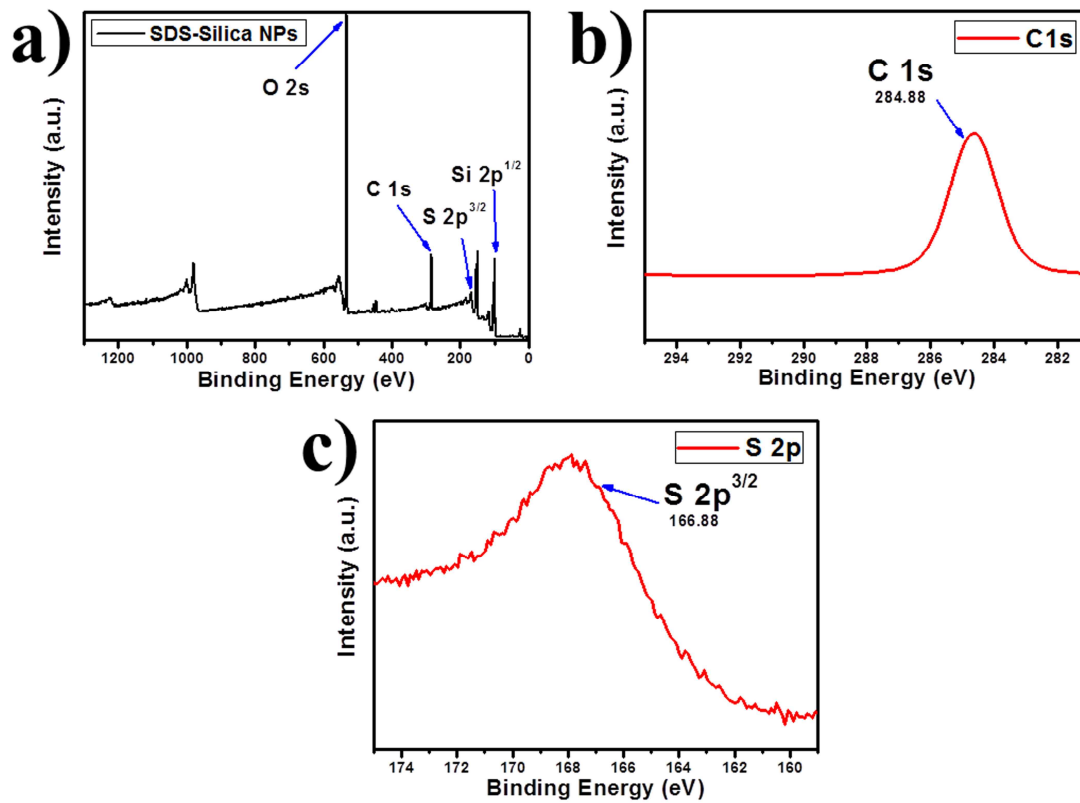

**Fig. S4** (a-c) XPS spectra of SNPs after SDS treatment. (a) Survey, (b) C 1s core-level, and (c) S 2p core-level.

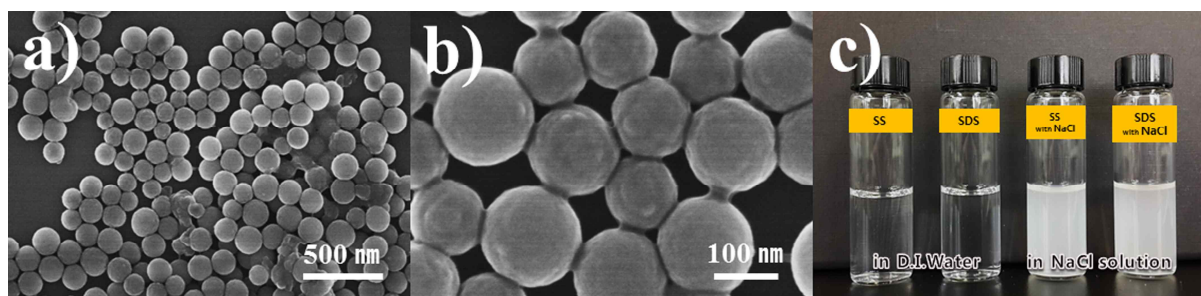

**Fig. S5** (a, b) SEM images of SNPs after SS treatment (80°C, 24 h) in the presence of 0.5 M NaCl. (c) Photographic image of SNP solution obtained in the absence or presence of 0.5 M NaCl.

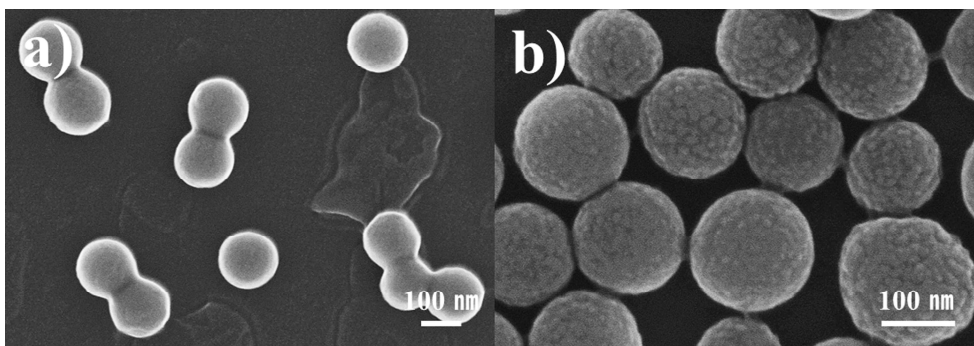

**Fig. S6** SEM images of SNPs (a) before and (b) after SS treatment (room temperature, 24 h).

Dispersity of aggregated SNPs can be enhanced by SS treatment.

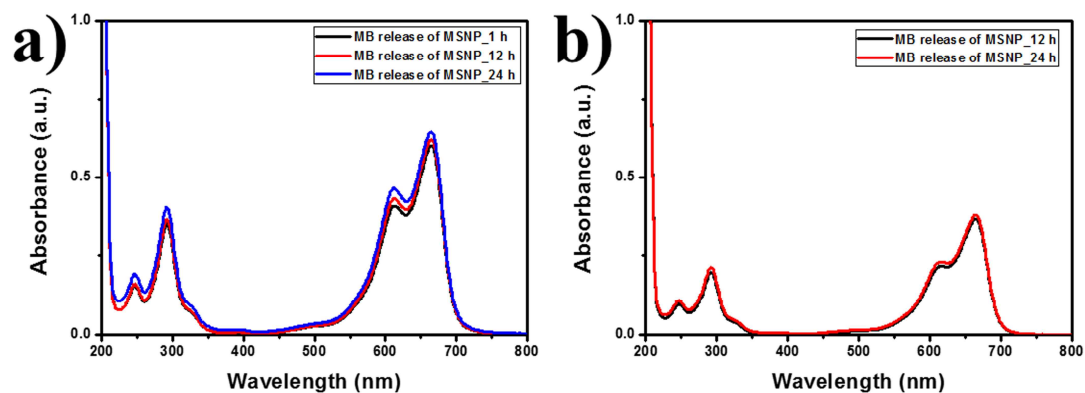

**Fig. S7** UV-vis absorption spectra of the MB released from the MSNP-MB as a function of increasing reaction time. (a) 2<sup>nd</sup> step desorption (13 h - 36 h) and (b) 3<sup>rd</sup> step desorption (48 h - 60 h) of MB released from the MSNP-MB in 0.5 M NaCl solution.



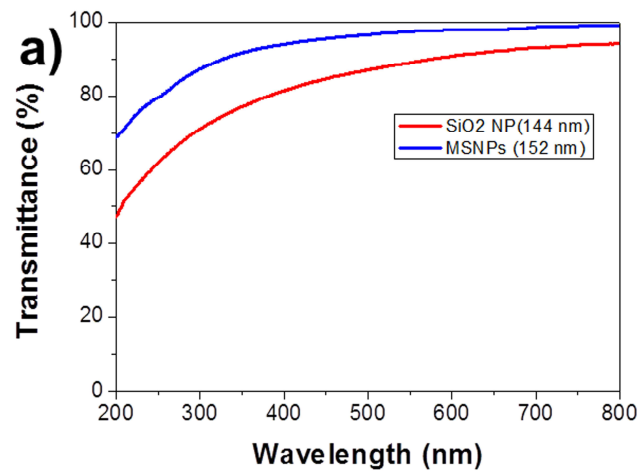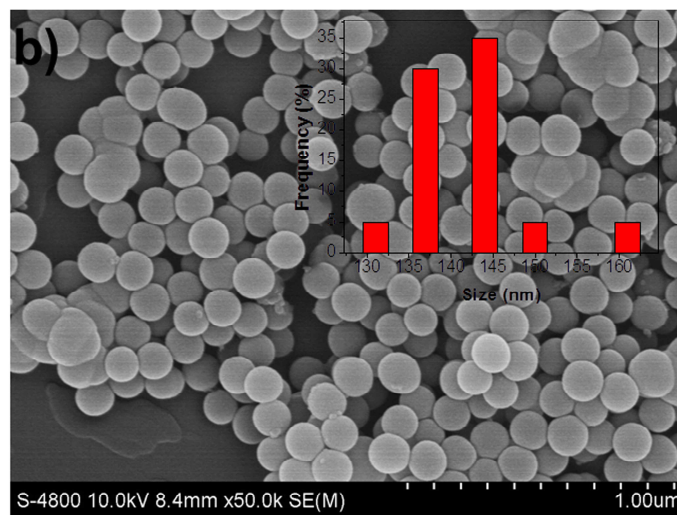

**Fig. S8** a) Optical transmittance spectra of MSNPs (152 nm) and pristine SNPs (144 nm) and b) SEM image of pristine SNPs (144 nm) and (inset) its particle size data.
